# Supplementary material for: Cryptic MHC-E epitope from influenza elicits a potent cytolytic T cell response
Source: Research Square preprint supplement (doi:10.21203/rs.3.rs-2105807/v1), 2022-09-29
Supplement: Supplementary file 1 [file 141f0c09a984fdd5d5fb1f39.pdf]

Extended Data Table 2 | M-SL9 conservation across representative IAV vaccine strains recommended by WHO, 2002 to 2022.

| Northern hemisphere winter | Vaccine type         | H1N1 subtype                            |                              |                              |                        |                        | H3N2 subtype                    |                 |                              |                        |                        |
|----------------------------|----------------------|-----------------------------------------|------------------------------|------------------------------|------------------------|------------------------|---------------------------------|-----------------|------------------------------|------------------------|------------------------|
|                            |                      | Vaccine virus strain                    | M-SL9 sequence*              | Qa-1 <sup>b</sup> prediction | HLA-E*01:01 prediction | HLA-E*01:03 prediction | Vaccine virus strain            | M-SL9 sequence* | Qa-1 <sup>b</sup> prediction | HLA-E*01:01 prediction | HLA-E*01:03 prediction |
| 2002–2003                  | egg                  | A/New Caledonia/20/99 (sH1N1)           | MSLLERIPIL                   | 0.17                         | 0.01                   | 0.01                   | A/Moscow/10/99                  | MSLLGKTQIL      | 0.37                         | 0.09                   | 0.09                   |
| 2003–2004                  | egg                  | A/New Caledonia/20/99 (sH1N1)           | MSLLERIPIL                   | 0.17                         | 0.01                   | 0.01                   | A/Moscow/10/99                  | MSLLGKTQIL      | 0.37                         | 0.09                   | 0.09                   |
| 2004–2005                  | egg                  | A/New Caledonia/20/99 (sH1N1)           | MSLLERIPIL                   | 0.17                         | 0.01                   | 0.01                   | A/Fujian/411/2002               | MSLLGKTQIL      | 0.37                         | 0.09                   | 0.09                   |
| 2005–2006                  | egg                  | A/New Caledonia/20/99 (sH1N1)           | MSLLERIPIL                   | 0.17                         | 0.01                   | 0.01                   | A/California/7/2004             | MSLLGKTQIL      | 0.37                         | 0.09                   | 0.09                   |
| 2006–2007                  | egg                  | A/New Caledonia/20/99 (sH1N1)           | MSLLERIPIL                   | 0.17                         | 0.01                   | 0.01                   | A/Wisconsin/67/2005             | MSLLGKTQIL      | 0.37                         | 0.09                   | 0.09                   |
| 2007–2008                  | egg                  | A/Solomon Islands/3/2006 (sH1N1)        | MYLLERIPIL                   | 0.15                         | 0.02                   | 0.02                   | A/Wisconsin/67/2005             | MSLLGKTQIL      | 0.37                         | 0.09                   | 0.09                   |
| 2008–2009                  | egg                  | A/Brisbane/59/2007 (sH1N1)              | MYLLERIPIL                   | 0.15                         | 0.02                   | 0.02                   | A/Brisbane/10/2007              | MSLLGKTQIL      | 0.37                         | 0.09                   | 0.09                   |
| 2009–2010                  | egg                  | A/Brisbane/59/2007 (sH1N1)              | MYLLERIPIL                   | 0.15                         | 0.02                   | 0.02                   | A/Brisbane/10/2007              | MSLLGKTQIL      | 0.37                         | 0.09                   | 0.09                   |
| 2010–2011                  | egg                  | A/California/7/2009 (pdm09)             | VSLQERTQIL                   | 0.2                          | 0.03                   | 0.03                   | A/Perth/16/2009                 | MSLLGKTQIL      | 0.37                         | 0.09                   | 0.09                   |
| 2011–2012                  | egg                  | A/California/7/2009 (pdm09)             | VSLQERTQIL                   | 0.2                          | 0.03                   | 0.03                   | A/Perth/16/2009                 | MSLLGKTQIL      | 0.37                         | 0.09                   | 0.09                   |
| 2012–2013                  | egg                  | A/California/7/2009 (pdm09)             | VSLQERTQIL                   | 0.2                          | 0.03                   | 0.03                   | A/Victoria/361/2011             | MSLLGKTQIL      | 0.37                         | 0.09                   | 0.09                   |
| 2013–2014                  | egg                  | A/California/7/2009 (pdm09)             | VSLQERTQIL                   | 0.2                          | 0.03                   | 0.03                   | A/Victoria/361/2011             | MSLLGKTQIL      | 0.37                         | 0.09                   | 0.09                   |
| 2014–2015                  | egg                  | A/California/7/2009 (pdm09)             | VSLQERTQIL                   | 0.2                          | 0.03                   | 0.03                   | A/Texas/50/2012                 | MSLLGKTQIL      | 0.37                         | 0.09                   | 0.09                   |
| 2015–2016                  | egg                  | A/California/7/2009 (pdm09)             | VSLQERTQIL                   | 0.2                          | 0.03                   | 0.03                   | A/Switzerland/9715293/2013      | MSLLGKTQIL      | 0.37                         | 0.09                   | 0.09                   |
| 2016–2017                  | egg                  | A/California/7/2009 (pdm09)             | VSLQERTQIL                   | 0.2                          | 0.03                   | 0.03                   | A/Hong Kong/4801/2014           | MSLLGKTQIL      | 0.37                         | 0.09                   | 0.09                   |
| 2017–2018                  | egg                  | A/Michigan/45/2015 (pdm09)              | VSLQERTQIL                   | 0.2                          | 0.03                   | 0.03                   | A/Hong Kong/4801/2014           | MSLLGKTQIL      | 0.37                         | 0.09                   | 0.09                   |
| 2018–2019                  | egg                  | A/Michigan/45/2015 (pdm09)              | VSLQERTQIL                   | 0.2                          | 0.03                   | 0.03                   | A/Singapore/INFIMH-16-0019/2016 | MSLLGKTQIL      | 0.37                         | 0.09                   | 0.09                   |
| 2019–2020                  | egg                  | A/Brisbane/02/2018 (pdm09)              | VSLQERTQIL                   | 0.2                          | 0.03                   | 0.03                   | A/Kansas/14/2017                | MSLLGKTQIL      | 0.37                         | 0.09                   | 0.09                   |
| 2020–2021                  | egg                  | A/Guangdong-Maonan/SWL1536/2019 (pdm09) | VSLQERTQIL                   | 0.2                          | 0.03                   | 0.03                   | A/Hong Kong/2671/2019           | MSLLGKTQIL      | 0.37                         | 0.09                   | 0.09                   |
| 2020–2021                  | cell culture         | A/Hawaii/70/2019 (pdm09)                | VSLQERTQIL                   | 0.2                          | 0.03                   | 0.03                   | A/Hong Kong/45/2019             | MSLLGKTQIL      | 0.37                         | 0.09                   | 0.09                   |
| 2021–2022                  | egg                  | A/Victoria/2570/2019 (pdm09)            | VSLQERTQIL                   | 0.2                          | 0.03                   | 0.03                   | A/Cambodia/e0826360/2020        | MSLLGKTQIL      | 0.37                         | 0.09                   | 0.09                   |
| 2021–2022                  | cell culture         | A/Wisconsin/588/2019 (pdm09)            | VSLQERTQIL                   | 0.2                          | 0.03                   | 0.03                   | A/Cambodia/e0826360/2020        | MSLLGKTQIL      | 0.37                         | 0.09                   | 0.09                   |
| 2022–2023                  | egg                  | A/Victoria/2570/2019 (pdm09)            | VSLQERTQIL                   | 0.2                          | 0.03                   | 0.03                   | A/Darwin/9/2021                 | MSLLGKTQIL      | 0.37                         | 0.09                   | 0.09                   |
| 2022–2023                  | cell culture         | A/Wisconsin/588/2019 (pdm09)            | VSLQERTQIL                   | 0.2                          | 0.03                   | 0.03                   | A/Darwin/6/2021                 | MSLLGKTQIL      | 0.37                         | 0.09                   | 0.09                   |
| Reference accession        | Reference virus name | M-SL9 sequence*                         | Qa-1 <sup>b</sup> prediction | HLA-E*01:01 prediction       | HLA-E*01:03 prediction |                        |                                 |                 |                              |                        |                        |
| GenBank AF389121           | A/Puerto Rico/8/1934 | MSLQGRLLIL                              | 0.39                         | 0.06                         | 0.06                   |                        |                                 |                 |                              |                        |                        |

\*M-SL9 sequences are preceded by a methionine codon (AUG2) shown in blue or a valine codon shown in red.
