# Supplementary material for: Cryptic MHC-E epitope from influenza elicits a potent cytolytic T cell response
Source: Research Square preprint supplement (doi:10.21203/rs.3.rs-2105807/v1), 2022-09-29
Supplement: Supplementary file 2 [file 2fcec97e1225609a0620cadf.pdf]

**Extended Data Table 1** | Frequency and sequence identity of top TCRβ VDJ recombinations in FACS-sorted T cells from PR8-infected mice.

| CD8 population | Mouse #/VDJ rank | VDJ amino acid sequence | V gene     | J gene     | Frequency |
|----------------|------------------|-------------------------|------------|------------|-----------|
| Naive          | 1/1              | CASGDAGEQYF             | TCRBV13-02 | TCRBJ02-07 | 0.06%     |
| Naive          | 1/2              | CASSDAGEYQYF            | TCRBV13-01 | TCRBJ02-07 | 0.03%     |
| Naive          | 1/3              | CTCSADRGNTVFF           | TCRBV01-01 | TCRBJ01-01 | 0.02%     |
| Naive          | 1/4              | CASGDAGEYQYF            | TCRBV13-02 | TCRBJ02-07 | 0.02%     |
| Naive          | 1/5              | CASSPPTGGYEQYF          | TCRBV12-01 | TCRBJ02-07 | 0.02%     |
| Naive          | 1/6              | CASSLGGYEQYF            | TCRBV29-01 | TCRBJ02-07 | 0.02%     |
| Naive          | 1/7              | CTCSADRANTEVFF          | TCRBV01-01 | TCRBJ01-01 | 0.02%     |
| Naive          | 1/8              | CASSLGDSEYQYF           | TCRBV12-01 | TCRBJ02-07 | 0.02%     |
| Naive          | 1/9              | CASSDAGEYQYF            | TCRBV13-01 | TCRBJ02-07 | 0.02%     |
| Naive          | 1/10             | CTCSADRYEQYF            | TCRBV01-01 | TCRBJ02-07 | 0.02%     |
| Naive          | 1/others         |                         |            |            | 99.73%    |
| Naive          | 2/1              | CASGDAGEQYF             | TCRBV13-02 | TCRBJ02-07 | 0.07%     |
| Naive          | 2/2              | CASSPPTGGYEQYF          | TCRBV05-01 | TCRBJ02-07 | 0.03%     |
| Naive          | 2/3              | CASGDRLGGYEQYF          | TCRBV13-02 | TCRBJ02-07 | 0.03%     |
| Naive          | 2/4              | CASSLGGNYAEQFF          | TCRBV12-01 | TCRBJ02-01 | 0.02%     |
| Naive          | 2/5              | CASGDAGGSAAETLYF        | TCRBV13-02 | TCRBJ02-03 | 0.02%     |
| Naive          | 2/6              | CASGDAGEYQYF            | TCRBV13-02 | TCRBJ02-07 | 0.02%     |
| Naive          | 2/7              | CASSQGYEQYF             | TCRBV05-01 | TCRBJ02-07 | 0.02%     |
| Naive          | 2/8              | CASSLTGGYEQYF           | TCRBV14-01 | TCRBJ02-07 | 0.02%     |
| Naive          | 2/9              | CTCSADEQYF              | TCRBV01-01 | TCRBJ02-07 | 0.02%     |
| Naive          | 2/10             | CASSLVNSGNTLYF          | TCRBV16-01 | TCRBJ01-03 | 0.02%     |
| Naive          | 2/others         |                         |            |            | 99.73%    |
| Naive          | 3/1              | CASGDAGEQYF             | TCRBV13-02 | TCRBJ02-07 | 0.06%     |
| Naive          | 3/2              | CASSPPTGGYEQYF          | TCRBV12-01 | TCRBJ02-07 | 0.03%     |
| Naive          | 3/3              | CTCSAGNSGNTLYF          | TCRBV01-01 | TCRBJ01-03 | 0.02%     |
| Naive          | 3/4              | CTCSAGTGGYEQYF          | TCRBV01-01 | TCRBJ02-07 | 0.02%     |
| Naive          | 3/5              | CASSSGTGGYEQYF          | TCRBV03-01 | TCRBJ02-07 | 0.02%     |
| Naive          | 3/6              | CASSPPTGGYEQYF          | TCRBV05-01 | TCRBJ02-07 | 0.02%     |
| Naive          | 3/7              | CASSPPTGGYEQYF          | TCRBV04-01 | TCRBJ02-07 | 0.02%     |
| Naive          | 3/8              | CASSLGYEQYF             | TCRBV12-01 | TCRBJ02-07 | 0.02%     |
| Naive          | 3/9              | CTCSADRANTEVFF          | TCRBV01-01 | TCRBJ01-01 | 0.02%     |
| Naive          | 3/10             | CASSDAGEYQYF            | TCRBV13-01 | TCRBJ02-07 | 0.02%     |
| Naive          | 3/others         |                         |            |            | 99.74%    |
| Naive          | 4/1              | CASGDAGEQYF             | TCRBV13-02 | TCRBJ02-07 | 0.09%     |
| Naive          | 4/2              | CASSLGYEQYF             | TCRBV12-01 | TCRBJ02-07 | 0.05%     |
| Naive          | 4/3              | CASGDAGEYQYF            | TCRBV13-02 | TCRBJ02-07 | 0.03%     |
| Naive          | 4/4              | CASGDGYEQYF             | TCRBV13-02 | TCRBJ02-07 | 0.03%     |
| Naive          | 4/5              | CASGDEYQYF              | TCRBV13-02 | TCRBJ02-07 | 0.03%     |
| Naive          | 4/6              | CASSQDNYEQYF            | TCRBV05-01 | TCRBJ02-07 | 0.03%     |
| Naive          | 4/7              | CASGDRLGGYEQYF          | TCRBV13-02 | TCRBJ02-07 | 0.03%     |
| Naive          | 4/8              | CASSLGGYEQYF            | TCRBV12-01 | TCRBJ02-07 | 0.03%     |
| Naive          | 4/9              | CASSLANSGNTLYF          | TCRBV16-01 | TCRBJ01-03 | 0.03%     |
| Naive          | 4/10             | CASSPPTGGYEQYF          | TCRBV12-01 | TCRBJ02-07 | 0.02%     |
| Naive          | 4/others         |                         |            |            | 99.64%    |
| Naive          | 5/1              | CASGDAGEQYF             | TCRBV13-02 | TCRBJ02-07 | 0.08%     |
| Naive          | 5/2              | CTCSAVSYEQYF            | TCRBV01-01 | TCRBJ02-07 | 0.06%     |
| Naive          | 5/3              | CASSLTGGYEQYF           | TCRBV12-01 | TCRBJ02-07 | 0.04%     |
| Naive          | 5/4              | CASGDAGEYQYF            | TCRBV13-02 | TCRBJ02-07 | 0.04%     |
| Naive          | 5/5              | CASSDNYEQYF             | TCRBV13-01 | TCRBJ02-07 | 0.04%     |
| Naive          | 5/6              | CASSSGTGGYEQYF          | TCRBV04-01 | TCRBJ02-07 | 0.04%     |
| Naive          | 5/7              | CASSIGTGGYEQYF          | TCRBV19-01 | TCRBJ02-07 | 0.04%     |
| Naive          | 5/8              | CASSDSYEQYF             | TCRBV13-01 | TCRBJ02-07 | 0.04%     |
| Naive          | 5/9              | CASSLEGYEQYF            | TCRBV12-01 | TCRBJ02-07 | 0.03%     |
| Naive          | 5/10             | CTCSADRGNTVFF           | TCRBV01-01 | TCRBJ01-01 | 0.03%     |
| Naive          | 5/others         |                         |            |            | 99.57%    |
| Naive          | 6/1              | CASSIGGEQYF             | TCRBV19-01 | TCRBJ02-07 | 0.03%     |
| Naive          | 6/2              | CASGDAGEYQYF            | TCRBV13-02 | TCRBJ02-07 | 0.03%     |
| Naive          | 6/3              | CASSPPTGGYEQYF          | TCRBV05-01 | TCRBJ02-07 | 0.03%     |
| Naive          | 6/4              | CASSLVDSGNTLYF          | TCRBV16-01 | TCRBJ01-03 | 0.03%     |
| Naive          | 6/5              | CASSLGGYEQYF            | TCRBV12-01 | TCRBJ02-07 | 0.03%     |
| Naive          | 6/6              | CASSLGGNYAEQFF          | TCRBV12-01 | TCRBJ02-01 | 0.03%     |
| Naive          | 6/7              | CASGDAGEYQYF            | TCRBV13-02 | TCRBJ02-07 | 0.02%     |
| Naive          | 6/8              | CASSSGTGGYEQYF          | TCRBV04-01 | TCRBJ02-07 | 0.02%     |
| Naive          | 6/9              | CASGDAGGSAAETLYF        | TCRBV13-02 | TCRBJ02-03 | 0.02%     |
| Naive          | 6/10             | CASSLDNYEQYF            | TCRBV12-02 | TCRBJ02-07 | 0.02%     |
| Naive          | 6/others         |                         |            |            | 99.73%    |
| M-SL9-specific | 1/1              | CASSEQPPYSAETLYF        | TCRBV13-01 | TCRBJ02-03 | 7.71%     |
| M-SL9-specific | 1/2              | CASSYGDTYEQYF           | TCRBV04-01 | TCRBJ02-07 | 6.45%     |
| M-SL9-specific | 1/3              | CASSLQGGTGLYF           | TCRBV04-01 | TCRBJ02-02 | 4.33%     |
| M-SL9-specific | 1/4              | CASSWGNVYAEQFF          | TCRBV04-01 | TCRBJ02-01 | 4.17%     |
| M-SL9-specific | 1/5              | CASSLGLGDYEQYF          | TCRBV05-01 | TCRBJ02-07 | 4.09%     |
| M-SL9-specific | 1/6              | CASSLLEGEDEYQYF         | TCRBV14-01 | TCRBJ02-07 | 3.54%     |
| M-SL9-specific | 1/7              | CASSLDPLGGYEQYF         | TCRBV16-01 | TCRBJ02-07 | 3.46%     |
| M-SL9-specific | 1/8              | CASSPSPANTGQLYF         | TCRBV14-01 | TCRBJ02-02 | 3.38%     |
| M-SL9-specific | 1/9              | CASSDIANODTQYF          | TCRBV13-01 | TCRBJ02-05 | 2.97%     |
| M-SL9-specific | 1/10             | CASSLQNERLFF            | TCRBV19-01 | TCRBJ01-04 | 2.80%     |
| M-SL9-specific | 1/others         |                         |            |            | 57.10%    |
| M-SL9-specific | 2/1              | CGASPASYEQYF            | TCRBV20-01 | TCRBJ02-07 | 14.85%    |
| M-SL9-specific | 2/2              | CASSLWGGYEQYF           | TCRBV12-01 | TCRBJ02-07 | 12.52%    |
| M-SL9-specific | 2/3              | CASSPPTGGDNERLFF        | TCRBV05-01 | TCRBJ01-04 | 6.42%     |
| M-SL9-specific | 2/4              | CASSLAGDQTYF            | TCRBV12-02 | TCRBJ02-05 | 6.12%     |
| M-SL9-specific | 2/5              | CASSPPTGGYEQYF          | TCRBV05-01 | TCRBJ02-07 | 5.58%     |
| M-SL9-specific | 2/6              | CASSPPTGTYAEQFF         | TCRBV12-01 | TCRBJ02-01 | 5.55%     |
| M-SL9-specific | 2/7              | CASIGLGGPTQLYF          | TCRBV13-03 | TCRBJ02-02 | 5.18%     |
| M-SL9-specific | 2/8              | CASSLQGNQDTQYF          | TCRBV15-01 | TCRBJ02-05 | 3.67%     |
| M-SL9-specific | 2/9              | CASSLYRYSNPLYF          | TCRBV24-01 | TCRBJ01-06 | 3.24%     |
| M-SL9-specific | 2/10             | CASSPVGNTLYF            | TCRBV12-01 | TCRBJ02-04 | 2.48%     |
| M-SL9-specific | 2/others         |                         |            |            | 34.38%    |
| M-SL9-specific | 3/1              | CASSLVFGDEYQYF          | TCRBV12-01 | TCRBJ02-07 | 6.53%     |
| M-SL9-specific | 3/2              | CASSLQGGADTLYF          | TCRBV12-02 | TCRBJ01-03 | 6.01%     |
| M-SL9-specific | 3/3              | CASSSGLGGYEQYF          | TCRBV03-01 | TCRBJ02-07 | 4.64%     |
| M-SL9-specific | 3/4              | CASSFQRLGDEYQYF         | TCRBV14-01 | TCRBJ02-07 | 4.18%     |
| M-SL9-specific | 3/5              | CASSPPLGGYEQYF          | TCRBV03-01 | TCRBJ02-07 | 3.63%     |
| M-SL9-specific | 3/6              | CTCSASNTGQLYF           | TCRBV01-01 | TCRBJ02-02 | 3.17%     |
| M-SL9-specific | 3/7              | CASNNDQTYF              | TCRBV19-01 | TCRBJ02-05 | 3.00%     |
| M-SL9-specific | 3/8              | CASSLQGNSDYTF           | TCRBV12-02 | TCRBJ01-02 | 2.93%     |
| M-SL9-specific | 3/9              | CGARGRNSDYTF            | TCRBV20-01 | TCRBJ01-02 | 2.63%     |

|                |          |                   |            |            |        |
|----------------|----------|-------------------|------------|------------|--------|
| M-SL9-specific | 3/10     | CASSLALGDEQYF     | TCRBV15-01 | TCRBJ02-07 | 2.53%  |
| M-SL9-specific | 3/others |                   |            |            | 60.76% |
| M-SL9-specific | 4/1      | CASSLGLGGGEQYF    | TCRBV12-01 | TCRBJ02-07 | 11.87% |
| M-SL9-specific | 4/2      | CASSPQGDGEQYF     | TCRBV14-01 | TCRBJ02-07 | 4.12%  |
| M-SL9-specific | 4/3      | CASSYQGDQYF       | TCRBV16-01 | TCRBJ02-05 | 3.26%  |
| M-SL9-specific | 4/4      | CASGTGTGGYEQYF    | TCRBV13-02 | TCRBJ02-07 | 3.09%  |
| M-SL9-specific | 4/5      | CASSLDPLGGGEQYF   | TCRBV16-01 | TCRBJ02-07 | 3.08%  |
| M-SL9-specific | 4/6      | CASSLGLGEYEQYF    | TCRBV26-01 | TCRBJ02-07 | 2.92%  |
| M-SL9-specific | 4/7      | CASSLAQTYEQYF     | TCRBV12-02 | TCRBJ02-07 | 2.78%  |
| M-SL9-specific | 4/8      | CASSGGQNSDYTF     | TCRBV13-02 | TCRBJ01-02 | 2.64%  |
| M-SL9-specific | 4/9      | CASSHWGVEQYF      | TCRBV12-01 | TCRBJ02-07 | 2.57%  |
| M-SL9-specific | 4/10     | CATGDNYAEQFF      | TCRBV05-01 | TCRBJ02-01 | 2.55%  |
| M-SL9-specific | 4/others |                   |            |            | 61.12% |
| M-SL9-specific | 5/1      | CASSLMGGDSYTF     | TCRBV12-02 | TCRBJ01-02 | 15.10% |
| M-SL9-specific | 5/2      | CTCSGGLDNYAEQFF   | TCRBV01-01 | TCRBJ02-01 | 7.59%  |
| M-SL9-specific | 5/3      | CASSLGLGIYEQYF    | TCRBV04-01 | TCRBJ02-07 | 6.71%  |
| M-SL9-specific | 5/4      | CASSLAGEDTGLYF    | TCRBV14-01 | TCRBJ02-02 | 5.30%  |
| M-SL9-specific | 5/5      | CASSGTGGNSDYTF    | TCRBV13-03 | TCRBJ01-02 | 5.10%  |
| M-SL9-specific | 5/6      | CASSLGLGDYEQYF    | TCRBV05-01 | TCRBJ02-07 | 4.82%  |
| M-SL9-specific | 5/7      | CASSPQGGSGTGEQYF  | TCRBV26-01 | TCRBJ02-07 | 4.54%  |
| M-SL9-specific | 5/8      | CASSPTGGDNERLFF   | TCRBV05-01 | TCRBJ01-04 | 4.30%  |
| M-SL9-specific | 5/9      | CASSLGQYQDTQYF    | TCRBV12-02 | TCRBJ02-05 | 3.79%  |
| M-SL9-specific | 5/10     | CASSLDGRNTEVFF    | TCRBV15-01 | TCRBJ01-01 | 3.51%  |
| M-SL9-specific | 5/others |                   |            |            | 39.25% |
| M-SL9-specific | 6/1      | CASSLGGFSNERLFF   | TCRBV16-01 | TCRBJ01-04 | 10.43% |
| M-SL9-specific | 6/2      | CASSYFNSNERLFF    | TCRBV04-01 | TCRBJ01-04 | 5.46%  |
| M-SL9-specific | 6/3      | CASSPQGDGEQYF     | TCRBV16-01 | TCRBJ02-07 | 3.50%  |
| M-SL9-specific | 6/4      | CASSRQDQDTQYF     | TCRBV15-01 | TCRBJ02-05 | 2.75%  |
| M-SL9-specific | 6/5      | CASSMLGGHAEQFF    | TCRBV19-01 | TCRBJ02-01 | 2.47%  |
| M-SL9-specific | 6/6      | CASSLGGGDEQYF     | TCRBV14-01 | TCRBJ02-07 | 2.42%  |
| M-SL9-specific | 6/7      | CASSPQGAGYEQYF    | TCRBV12-02 | TCRBJ02-07 | 2.31%  |
| M-SL9-specific | 6/8      | CASSIGPQGSQDTQYF  | TCRBV19-01 | TCRBJ02-05 | 2.05%  |
| M-SL9-specific | 6/9      | CASSLTGFSYEQYF    | TCRBV12-02 | TCRBJ02-07 | 1.82%  |
| M-SL9-specific | 6/10     | CASSPEGLGYEQYF    | TCRBV05-01 | TCRBJ02-07 | 1.79%  |
| M-SL9-specific | 6/others |                   |            |            | 65.00% |
| NP366-specific | 1/1      | CASSGGGNTGQLYF    | TCRBV13-01 | TCRBJ02-02 | 13.65% |
| NP366-specific | 1/2      | CASSLAKAETLYF     | TCRBV16-01 | TCRBJ02-03 | 12.13% |
| NP366-specific | 1/3      | CASSARTANTEVFF    | TCRBV13-01 | TCRBJ01-01 | 9.64%  |
| NP366-specific | 1/4      | CASSQDRRNSYNSPLYF | TCRBV02-01 | TCRBJ01-06 | 9.03%  |
| NP366-specific | 1/5      | CASSQDLGGRYEQYF   | TCRBV05-01 | TCRBJ02-07 | 8.71%  |
| NP366-specific | 1/6      | CASSGGANTGQLYF    | TCRBV13-01 | TCRBJ02-02 | 6.75%  |
| NP366-specific | 1/7      | CASSQRGGNTGQLYF   | TCRBV02-01 | TCRBJ02-02 | 6.02%  |
| NP366-specific | 1/8      | CTCSADRRNSYNSPLYF | TCRBV01-01 | TCRBJ01-06 | 5.59%  |
| NP366-specific | 1/9      | CASSDHRTEVFF      | TCRBV13-01 | TCRBJ01-01 | 3.81%  |
| NP366-specific | 1/10     | CASSDESTEVEFF     | TCRBV13-03 | TCRBJ01-01 | 3.07%  |
| NP366-specific | 1/others |                   |            |            | 21.61% |
| NP366-specific | 2/1      | CASSLARDEQYF      | TCRBV16-01 | TCRBJ02-07 | 21.71% |
| NP366-specific | 2/2      | CASRDWGGAKAEQFF   | TCRBV15-01 | TCRBJ02-01 | 10.93% |
| NP366-specific | 2/3      | CASKGGGHTGQLYF    | TCRBV13-01 | TCRBJ02-02 | 6.32%  |
| NP366-specific | 2/4      | CASSGGANTGQLYF    | TCRBV13-01 | TCRBJ02-02 | 6.17%  |
| NP366-specific | 2/5      | CGARGDWGANAEQFF   | TCRBV20-01 | TCRBJ02-01 | 5.81%  |
| NP366-specific | 2/6      | CASKGGGNTGQLYF    | TCRBV13-01 | TCRBJ02-02 | 5.27%  |
| NP366-specific | 2/7      | CASSHWGVEQYF      | TCRBV12-01 | TCRBJ02-07 | 5.23%  |
| NP366-specific | 2/8      | CASSGGGNTGQLYF    | TCRBV13-01 | TCRBJ02-02 | 4.04%  |
| NP366-specific | 2/9      | CASSRGPSSYEQYF    | TCRBV12-01 | TCRBJ02-07 | 3.59%  |
| NP366-specific | 2/10     | CASGDERTGGSQNTLYF | TCRBV13-02 | TCRBJ02-04 | 3.08%  |
| NP366-specific | 2/others |                   |            |            | 27.87% |
| NP366-specific | 3/1      | CASSGGGNTGQLYF    | TCRBV13-01 | TCRBJ02-02 | 20.73% |
| NP366-specific | 3/2      | CGARDGGGEQYF      | TCRBV20-01 | TCRBJ02-07 | 14.44% |
| NP366-specific | 3/3      | CASSQDRRNSYNSPLYF | TCRBV02-01 | TCRBJ01-06 | 9.07%  |
| NP366-specific | 3/4      | CASSQGLGGRGEQYF   | TCRBV05-01 | TCRBJ02-07 | 8.83%  |
| NP366-specific | 3/5      | CASSDAANTEVFF     | TCRBV13-01 | TCRBJ01-01 | 7.28%  |
| NP366-specific | 3/6      | CASSIMGGGAETLYF   | TCRBV19-01 | TCRBJ02-03 | 5.10%  |
| NP366-specific | 3/7      | CASSQDLGGLYEQYF   | TCRBV05-01 | TCRBJ02-07 | 4.48%  |
| NP366-specific | 3/8      | CASSGGANTGQLYF    | TCRBV13-01 | TCRBJ02-02 | 3.40%  |
| NP366-specific | 3/9      | CASSPTASNTGQLYF   | TCRBV12-01 | TCRBJ02-02 | 3.11%  |
| NP366-specific | 3/10     | CASRGGANTGQLYF    | TCRBV13-01 | TCRBJ02-02 | 2.38%  |
| NP366-specific | 3/others |                   |            |            | 21.18% |
| NP366-specific | 4/1      | CASSGGGNTGQLYF    | TCRBV13-01 | TCRBJ02-02 | 18.22% |
| NP366-specific | 4/2      | CASSDRGRREQYF     | TCRBV17-01 | TCRBJ02-07 | 15.02% |
| NP366-specific | 4/3      | CASKGGGNTGQLYF    | TCRBV13-01 | TCRBJ02-02 | 13.75% |
| NP366-specific | 4/4      | CASSGGANTGQLYF    | TCRBV13-01 | TCRBJ02-02 | 11.75% |
| NP366-specific | 4/5      | CASSQGLGGRGEQYF   | TCRBV05-01 | TCRBJ02-07 | 6.42%  |
| NP366-specific | 4/6      | CASSLARDEQYF      | TCRBV16-01 | TCRBJ02-07 | 6.41%  |
| NP366-specific | 4/7      | CASSQDLGGLYEQYF   | TCRBV05-01 | TCRBJ02-07 | 5.01%  |
| NP366-specific | 4/8      | CASRGGANTGQLYF    | TCRBV13-01 | TCRBJ02-02 | 3.98%  |
| NP366-specific | 4/9      | CAWSLRGDEQYF      | TCRBV31-01 | TCRBJ02-07 | 3.23%  |
| NP366-specific | 4/10     | CGAREGYEQYF       | TCRBV20-01 | TCRBJ02-07 | 2.72%  |
| NP366-specific | 4/others |                   |            |            | 13.49% |
| NP366-specific | 5/1      | CASSQDRRNSYNSPLYF | TCRBV02-01 | TCRBJ01-06 | 28.17% |
| NP366-specific | 5/2      | CGARDHRGTYLYF     | TCRBV20-01 | TCRBJ02-03 | 10.89% |
| NP366-specific | 5/3      | CTCSADLRNSYNSPLYF | TCRBV01-01 | TCRBJ01-06 | 10.79% |
| NP366-specific | 5/4      | CASSGGGNTGQLYF    | TCRBV13-01 | TCRBJ02-02 | 10.66% |
| NP366-specific | 5/5      | CASSLQGRSPLYF     | TCRBV29-01 | TCRBJ01-06 | 8.28%  |
| NP366-specific | 5/6      | CASSOELGGVYEQYF   | TCRBV05-01 | TCRBJ02-07 | 7.39%  |
| NP366-specific | 5/7      | CASSGGANTGQLYF    | TCRBV13-01 | TCRBJ02-02 | 4.28%  |
| NP366-specific | 5/8      | CTCSADFRNSYNSPLYF | TCRBV01-01 | TCRBJ01-06 | 2.27%  |
| NP366-specific | 5/9      | CASSPRYNOAPLF     | TCRBV05-01 | TCRBJ01-05 | 1.69%  |
| NP366-specific | 5/10     | CTCSADRRNSYNSPLYF | TCRBV01-01 | TCRBJ01-06 | 1.67%  |
| NP366-specific | 5/others |                   |            |            | 13.92% |
| NP366-specific | 6/1      | CTCSADLWGNAEQFF   | TCRBV01-01 | TCRBJ02-01 | 24.12% |
| NP366-specific | 6/2      | CASSQGPSSYEQYF    | TCRBV12-01 | TCRBJ02-07 | 20.94% |
| NP366-specific | 6/3      | CASSPDRRNSYNSPLYF | TCRBV02-01 | TCRBJ01-06 | 19.90% |
| NP366-specific | 6/4      | CASSGGANTGQLYF    | TCRBV13-01 | TCRBJ02-02 | 7.38%  |
| NP366-specific | 6/5      | CASGTGNGVAEQFF    | TCRBV04-01 | TCRBJ02-01 | 4.83%  |
| NP366-specific | 6/6      | CASSQERLGGREAEQFF | TCRBV05-01 | TCRBJ02-01 | 2.72%  |
| NP366-specific | 6/7      | CASRGGANTGQLYF    | TCRBV13-01 | TCRBJ02-02 | 2.44%  |
| NP366-specific | 6/8      | CTCSADLGGSSYEQYF  | TCRBV01-01 | TCRBJ02-07 | 1.94%  |
| NP366-specific | 6/9      | CTCSAERRASNSPLYF  | TCRBV01-01 | TCRBJ01-06 | 1.74%  |
| NP366-specific | 6/10     | CASSDGHKTEVFF     | TCRBV13-03 | TCRBJ01-01 | 1.28%  |
| NP366-specific | 6/others |                   |            |            | 12.72% |
